# Supplementary material
Source: PubMed Central journal article supplement (PMC3031480)

**Figure S1. Summary of study samples**

A total of 24 treatment naïve patients were included, in 12 patients cells from all 3 anatomic compartments were available, in 10 patients these were obtained on the same day, in 2 patient the BM and LN samples were collected on different days, each paired with a PB sample.

**Figure S2. Unsupervised hierarchical clustering of all 62 arrays**

Probesets with no expression signal in any of the samples were removed. Patients are numbered as in table 1, compartmental origin: BM, red; LN, blue; PB, green.

**Figure S3. Expression of CXCR4 on CLL cells in PB and BM**

Comparative analysis of PB, BM aspirate (BMA), and BM biopsy (BMB) samples. Cells from BM biopsy were eluted in vitro by crushing and flushing of the core. The % CXCR4 expression above isotype control for CD19<sup>+</sup> gated cells is shown. Samples from the same patient are connected by lines.

**Figure S4. UM-CLL cells have a higher E2F score than M-CLL cells**

The E2F was computed individually as the average of the mRNA expression level of the leading edge genes for each LN sample. Comparison between M-CLL (n=5) and U-CLL cells is by Student's t-test.

Figure S1

| PB | BM | LN | Patients |
|----|----|----|----------|
| 14 | 12 | 12 | 12       |
| 7  | 7  |    | 7        |
| 5  |    | 5  | 5        |
| 26 | 19 | 17 | 24       |

Figure S2

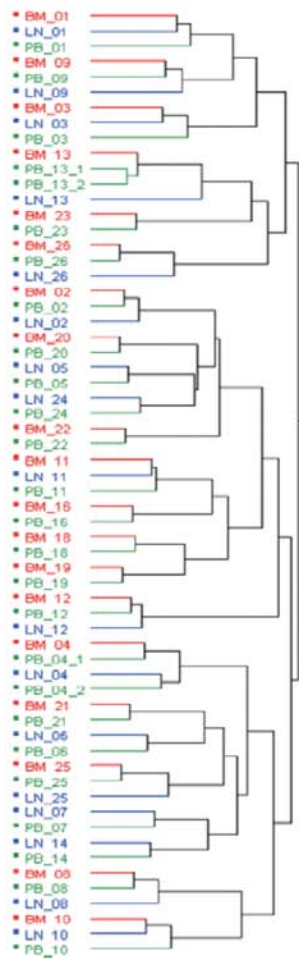

Figure S3

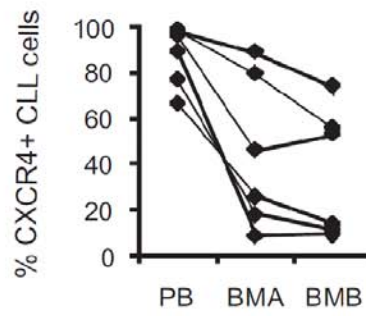

Figure S4

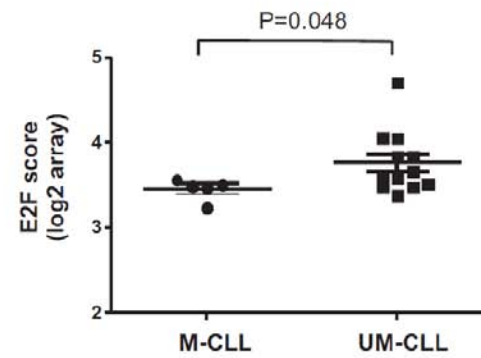

Supplement: blood-2010-05-284984_1.pdf [file blood-2010-05-284984_1.pdf]
